# Supplementary material
Source: PubMed Central journal article supplement (PMC4325795)
Supplement: AAC.04259-14_zac003153772so1.pdf [file AAC.04259-14_zac003153772so1.pdf]

Treatment algorithm for Gram-negative blood stream infections using Verigene<sup>®</sup> BC-GN  
for organism identification

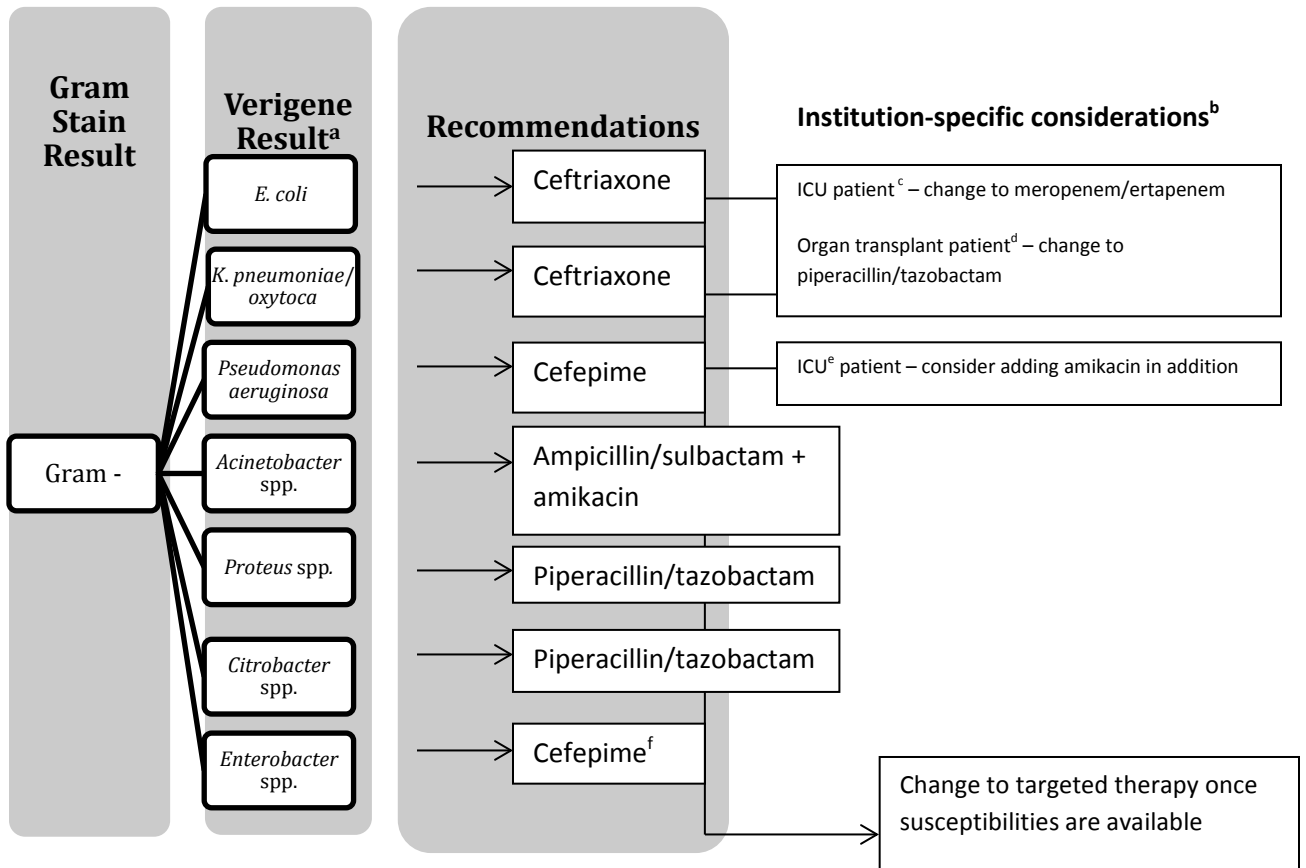

<sup>a</sup>"Not Detected" suggests an organism not on target list or false negative result and therefore clinical judgment and AST input only drive antibiotic choice. <sup>b</sup>Based on antibiogram from previous year (2011) with cut off values of 88% or higher for acceptable antibiotic inclusion. <sup>c</sup>Antibiogram susceptibility: *E. coli* CTX 86%, TZP 87%, IMI 100% and *K. pneumoniae* CTX 79%, TZP 75%, IMI 97%. <sup>d</sup>Antibiogram susceptibility: *E. coli* CTX 84%, TZP 90% and *K. pneumoniae* CTX 79% and TZP 94%. <sup>e</sup>Antibiogram Susceptibility: *P. aeruginosa* FEP 85%, AMK 97%. <sup>f</sup>Antibiogram Susceptibility: *Enterobacter spp.* (all locations) TZP 80%, FEP 98%.

Treatment algorithm for Gram-negative blood stream infections using Verigene<sup>®</sup> BC-GN  
for resistance targets

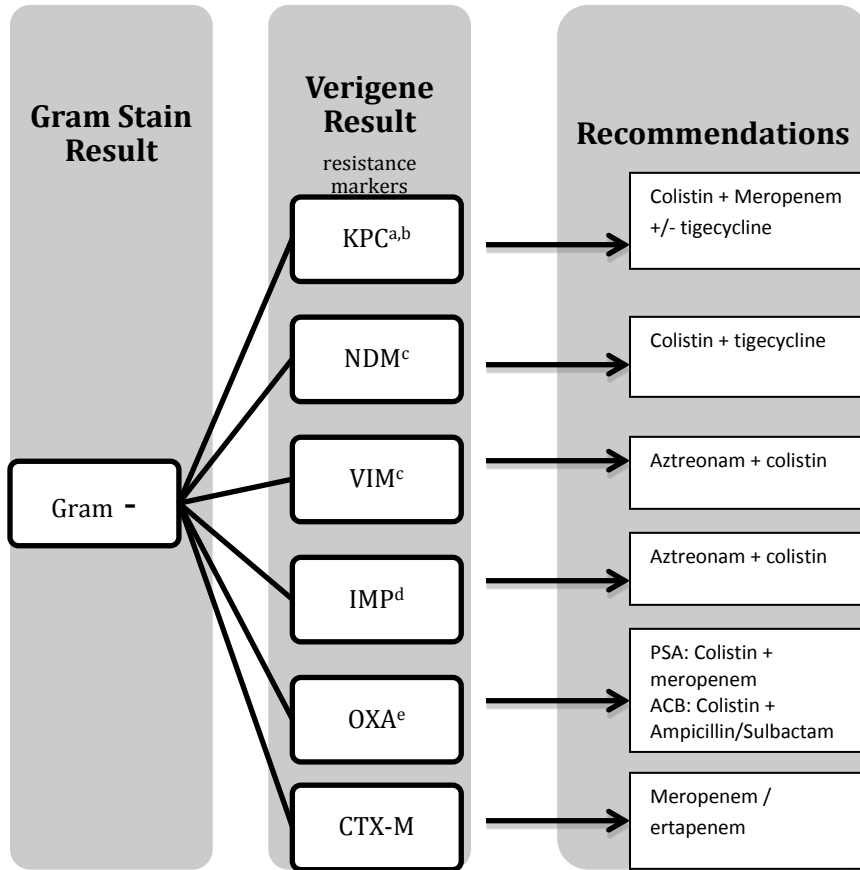

<sup>a</sup>Munoz-Price S, Poirel L, Bonomo RA et al. Lancet 2013;785. <sup>b</sup>Tumbarello M, Viale P, Viscoli C, et al. CID 2012; 55:943-50. <sup>c</sup>Tangden T, Hickman RA, Forsberg P, et al. AAC 2014, ahead of print. <sup>d</sup>Limbago BM, Rasheed JK, Anderson Zhu, et al. JCM 2011; 49:4239. <sup>e</sup>Walther-Rasmussen J, Hoiby N. JAC 2006; 57: 373-383, Falagason Z, Panagiota L, Panagiotis P, et al. AAC 2014; 58:654.
